# Supplementary figures and images for: Bimetallic V and Ti incorporated MCM-41 molecular sieves and their catalytic properties
Source: Royal Society of Chemistry journal article supplement (doi:10.1039/c4ra13600d), 2015-01-01

Supplementary Information

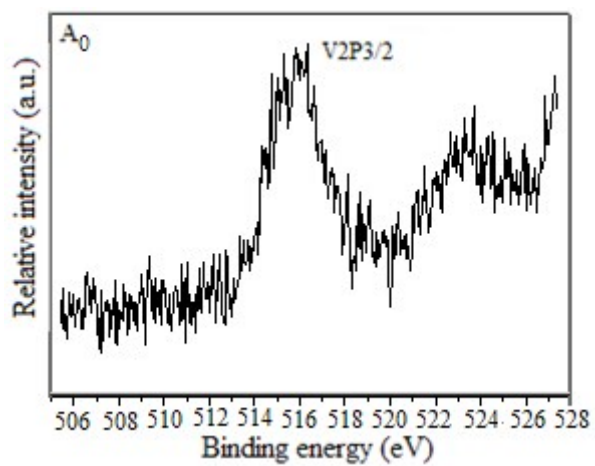

Fig. S1† The complete XPS spectrum of V in 3V-5Ti-MCM-41.

Supplement: c4ra13600d1.pdf [file c4ra13600d1.pdf]
